# Supplementary material for: Solution processable in situ passivated silicon nanowires
Source: Royal Society of Chemistry journal article supplement (doi:10.1039/d1nr02131a), 2021-01-01
Supplement: d1nr02131a1.pdf [file d1nr02131a1.pdf]

## Supporting Information

### **Solution Processable in-situ Passivated Silicon Nanowires**

*Jun Yan<sup>†,a</sup>, Kunpeng Ge<sup>†,a</sup>, Han Li<sup>b</sup>, Xueliang Yang<sup>c</sup>, Jingwei Chen<sup>a</sup>, Lu Wan<sup>a</sup>, Jianxin Guo<sup>a</sup>, Feng Li<sup>c</sup>, Ying Xu<sup>a</sup>, Dengyuan Song<sup>c</sup>, Benjamin S. Flavel<sup>b</sup>, Jianhui Chen<sup>\*,a,b</sup>*

<sup>a</sup> Hebei Key Lab of Optic-Electronic Information and Materials, College of Physics Science and Technology, Hebei University, Baoding 071002, China

<sup>b</sup> Institute of Nanotechnology, Karlsruhe Institute of Technology, Karlsruhe 76021, Germany.

<sup>c</sup> State Key Laboratory of Photovoltaic Materials & Technology, Yingli Green Energy Holding Co., Ltd., Baoding 071051, China

<sup>†</sup> These authors contributed equally to this work.

Corresponding author.

E-mail: [chenjianhui@hbu.edu.cn](mailto:chenjianhui@hbu.edu.cn) (J. Chen)

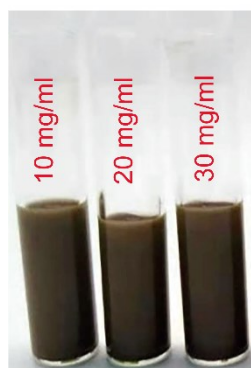

**Figure S1.** SiNWs dispersed in the ethanol with different concentrations.

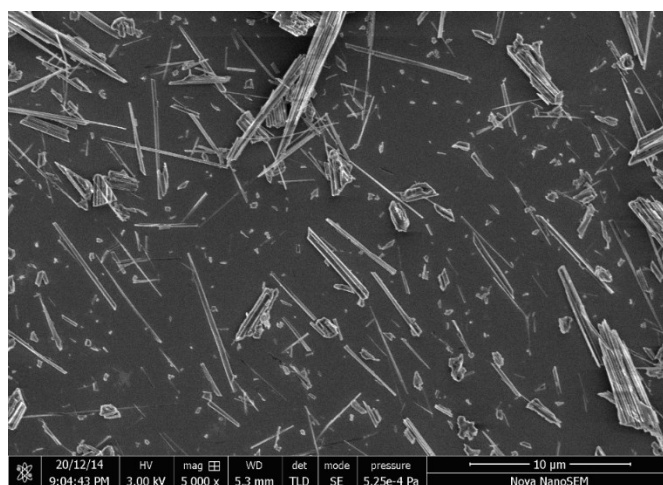

**Figure S2.** SEM images of SiNWs:ethanol thin films by spin-coating at 1000-3500 rpm.

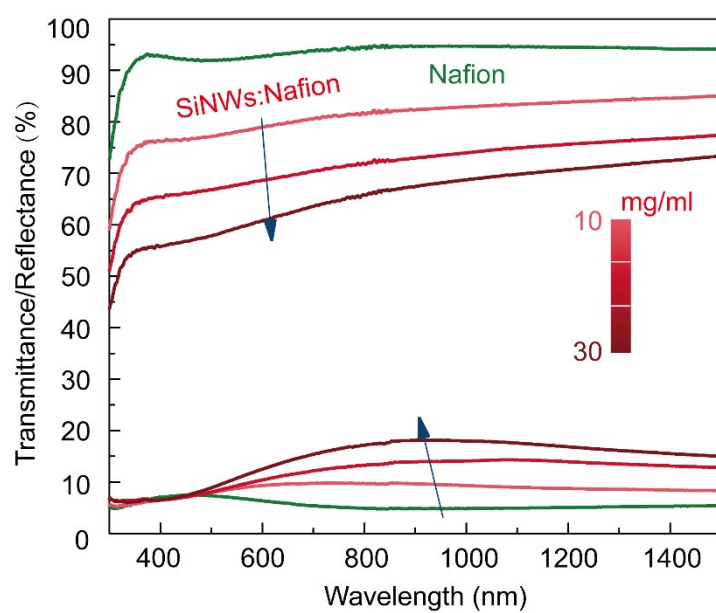

**Figure S3.** Transmittance (top) and reflectance (bottom) of the SiNWs:Nafion thin films with different concentration.

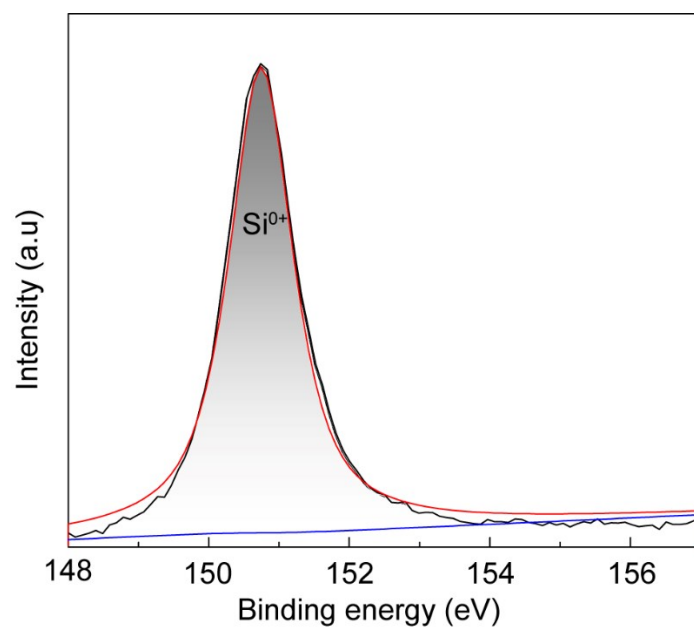

**Figure S4.** Si 2s spectra of SiNWs for XPS characterizations. Only the signal peaks of Si species ( $\text{Si}^0$ ) was detected, but without the peaks of Si sub-oxides in Figure 3a. Here we don't show Si 2s XPS of the Nafion/SiNWs sample because the insulating Nafion layer on the top of the SiNWs film impedes XPS measuring for the interface between Nafion and SiNWs film.

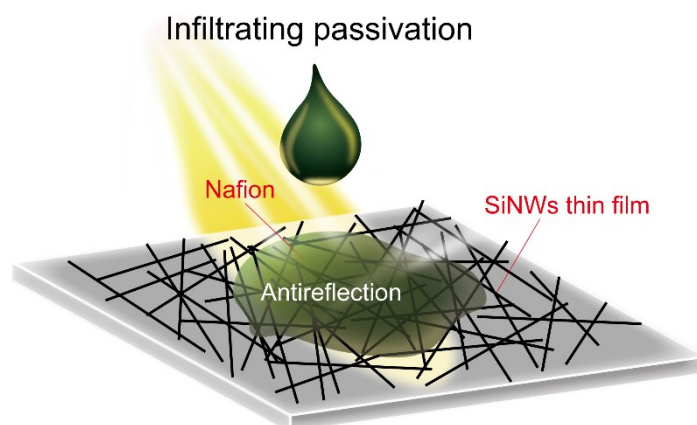

**Figure S5.** Illustration of a simple application of Nafion to SiNWs, inducing an antireflection effect and passivation at the same time.

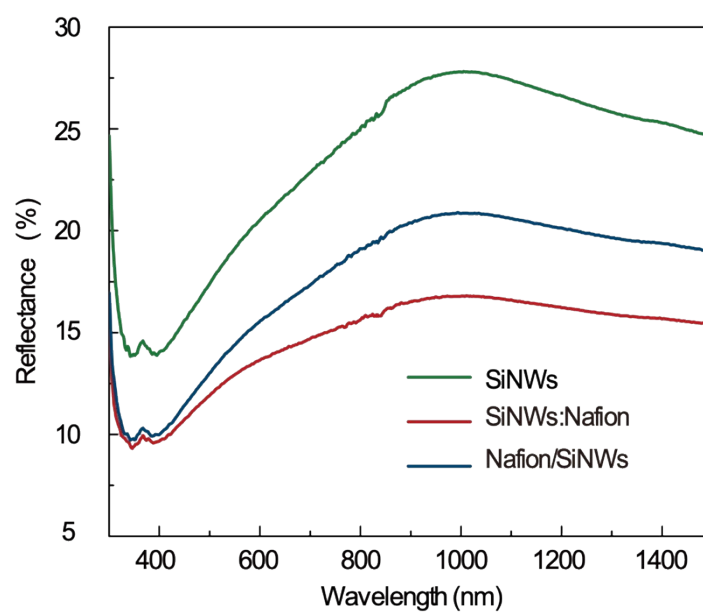

**Figure S6.** Transmittance and reflectance of SiNWs, SiNW:Nafion and Nafion/SiNWs film. The precursor solution concentration used for thin film is 20 mg/ml.

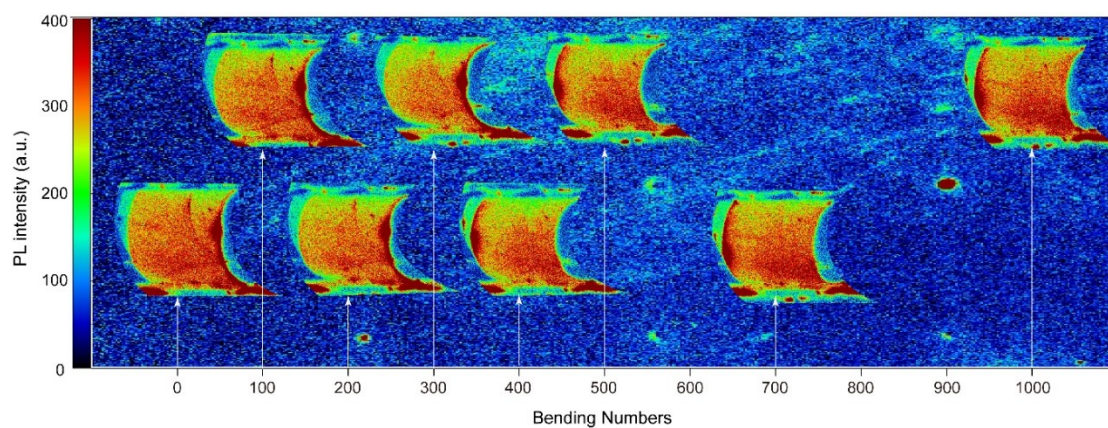

**Figure S7.** The spatially resolved infrared-PL imaging measurements of the SiNW:Nafion thin film on a flexible PET substrate with bending 1000 times.
